# Supplementary material
Source: Springer Nature journal article supplement (https://www.springermedizin.de/resource/supplementary/12936_2012_2595_MOESM5_ESM.pdf/9543154)

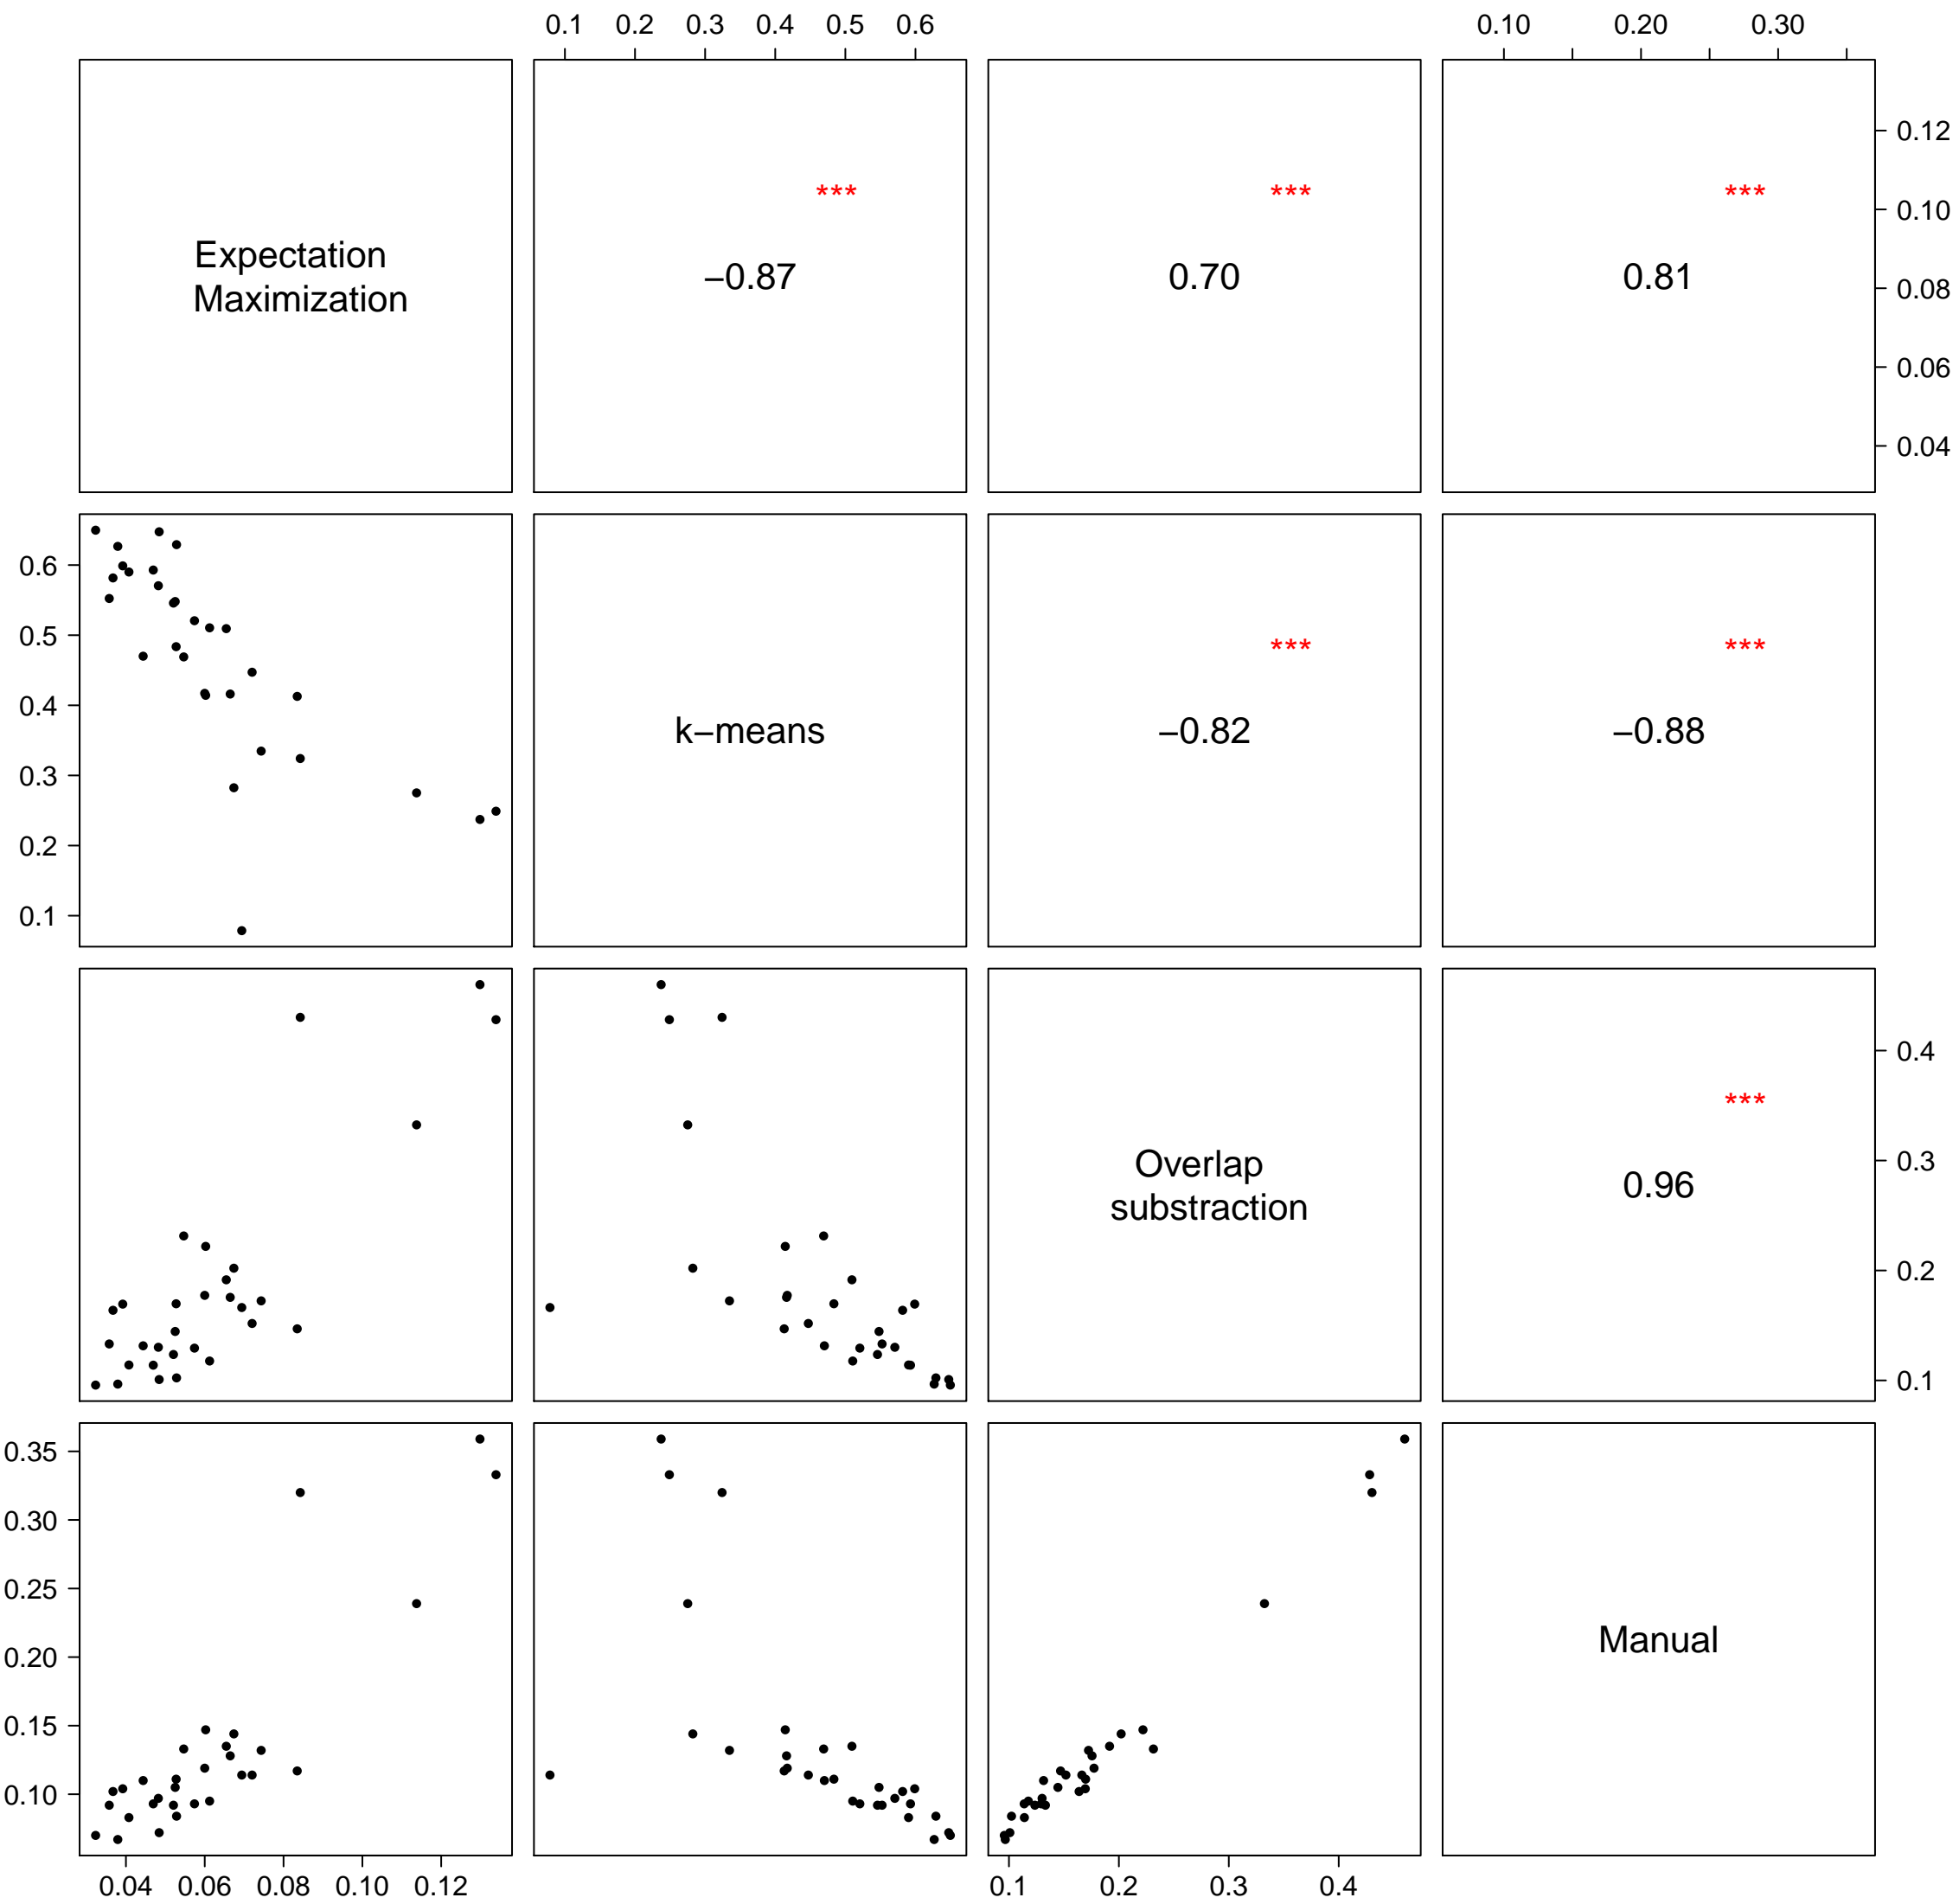

Supplement: MOESM5 [file 9543154]
